# Supplementary material for: COVID-19 breakthrough infection after inactivated vaccine induced robust antibody responses and cross-neutralization of SARS-CoV-2 variants, but less immunity against omicron
Source: bioRxiv or medRxiv preprint supplement (doi:10.1101/2022.01.17.22269415), 2022-01-18
Supplement: Supplementary file [file media-1.pdf]

## Supplementary Information

**Supplementary Figure 1:** Percentage of SARS-CoV-2 variants circulating in Thailand between 21 April 2021 and 20 September 2021.

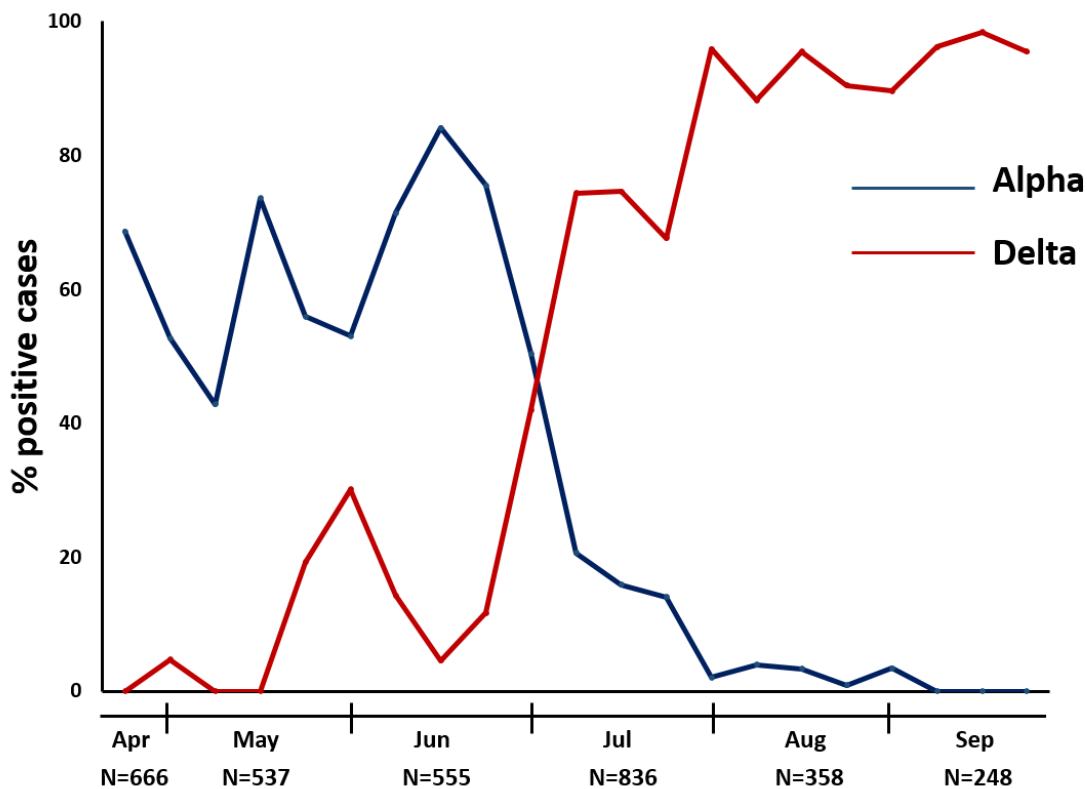

**Supplementary Table 1:** Characteristics of participants in the study.

| Characteristics                                                            | CV+CV<br>( <i>n</i> = 170) | CV+CV+AZ<br>( <i>n</i> = 210) | CV+CV+INF<br>( <i>n</i> = 78) |
|----------------------------------------------------------------------------|----------------------------|-------------------------------|-------------------------------|
| Sex ( <i>n</i> , %)                                                        |                            |                               |                               |
| female                                                                     | 89 (52.4%)                 | 151 (71.9%)                   | 58 (74.4%)                    |
| male                                                                       | 81 (47.6%)                 | 59 (28.1%)                    | 20 (25.6%)                    |
| Age in years (mean, SD)                                                    | 42.3 (9.6)                 | 40.0 (9.8)                    | 34.2 (9.9)                    |
| Interval between 1 <sup>st</sup> and 2 <sup>nd</sup> dose<br>(median, IQR) | 23 (21–26)                 | 21 (21–26)                    | 23 (21–28)                    |
| Interval between 2 <sup>nd</sup> and 3 <sup>rd</sup> dose<br>(median, IQR) | N/A                        | 70 (61–79)                    | N/A                           |

|                                                                       |            |            |             |
|-----------------------------------------------------------------------|------------|------------|-------------|
| Interval between 2 <sup>nd</sup> dose and symptom onset (median, IQR) | N/A        | N/A        | 88 (68–100) |
| Interval between last vaccination and blood sampling (median, IQR)    | 29 (27–31) | 28 (20–32) | N/A         |
| Interval between symptom onset and blood sampling (median, IQR)       | N/A        | N/A        | 34 (29–43)  |

CV+CV, fully vaccinated with two doses of CoronaVac; CV+CV+AZ, fully vaccinated with two doses of CoronaVac then administered a third vaccination with AZD1222; CV+CV+INF, fully vaccinated with two doses of CoronaVac followed by SARS-CoV-2 breakthrough infection; IQR, interquartile range; N/A, no data available; SD, standard deviation

**Supplementary Table 2:** Binding antibody levels including total anti-RBD Ig, anti-RBD IgG, and anti-S1 IgA. Neutralizing activities of sera from the three groups were measured via surrogate virus neutralization tests.

|                      | <b>CV+CV<br/>(n = 170)</b> | <b>CV+CV+AZ<br/>(n = 210)</b> | <b>CV+CV+INF<br/>(n = 78)</b> |
|----------------------|----------------------------|-------------------------------|-------------------------------|
| Anti-RBD-Ig          |                            |                               |                               |
| <i>n</i>             | 170                        | 210                           | 78                            |
| GMT (95% CI)         | 98 (83–116)                | 7947 (7277–8679)              | 18,154 (13,506–24,402)        |
| Anti-RBD IgG         |                            |                               |                               |
| <i>n</i>             | 170                        | 210                           | 78                            |
| GMT (95% CI)         | 128 (114–144)              | 1492 (1367–1629)              | 3668 (2802–4802)              |
| Anti-S1 IgA          |                            |                               |                               |
| <i>n</i>             | 51                         | 55                            | 78                            |
| Median (IQR)         | 0.9 (0.6–1.8)              | 5.3 (3.9–9.0)                 | 9.0 (8.7–9.0)                 |
| sVNT-wild type       |                            |                               |                               |
| <i>n</i>             | 36                         | 36                            | 78                            |
| Median (IQR)         | 66.6 (48.9–79.4)           | 97.7 (97.0–97.8)              | 97.5 (97.3–97.6)              |
| sVNT-B.1.1.7 (alpha) |                            |                               |                               |
| <i>n</i>             | 36                         | 36                            | 78                            |
| Median (IQR)         | 42.1 (29.0–58.3)           | 97.2 (94.7–97.7)              | 97.7 (97.3–98.0)              |
| sVNT-B.1.351 (beta)  |                            |                               |                               |

|                        |                  |                  |                  |
|------------------------|------------------|------------------|------------------|
| <i>n</i>               | 36               | 36               | 78               |
| Median (IQR)           | 34.8 (20.5–47.3) | 92.9 (86.8–94.8) | 95.6 (93.7–96.2) |
| sVNT-B.1.617.2 (delta) |                  |                  |                  |
| <i>n</i>               | 36               | 36               | 78               |
| Median (IQR)           | 48.9 (36.1–63.4) | 97.2 (95.6–97.9) | 97.9 (97.7–98.0) |

CI, confidence interval; CV+CV, fully vaccinated with two doses of CoronaVac; CV+CV+AZ, fully vaccinated with two doses of CoronaVac then administered a third vaccination with AZD1222; CV+CV+INF, fully vaccinated with two doses of CoronaVac followed by SARS-CoV-2 breakthrough infection; GMT, geometric mean titre; IQR, interquartile range; RBD, receptor-binding domain
